# Supplementary material for: Pneumococcal vaccination rates in immunocompromised patients in Germany: A retrospective cohort study to assess sequential vaccination rates and changes over time
Source: PubMed Central journal article supplement (PMC8939779; doi:10.1371/journal.pone.0265433), 2022-03-22
Supplement: pone.0265433.s003.pdf [file pone.0265433.s003.pdf]

**Table S2 States covered by east and west regions, of the regional Association of Statutory Health Insurance Physicians (AHIP) in Germany**

| Eastern German States                                                                                                                                                               | Western German states                                                                                                                                                                                                                                                                         |
|-------------------------------------------------------------------------------------------------------------------------------------------------------------------------------------|-----------------------------------------------------------------------------------------------------------------------------------------------------------------------------------------------------------------------------------------------------------------------------------------------|
| <ul style="list-style-type: none"><li>• Berlin</li><li>• Mecklenburg-Western Pomerania</li><li>• Brandenburg</li><li>• Saxony-Anhalt</li><li>• Thuringia</li><li>• Saxony</li></ul> | <ul style="list-style-type: none"><li>• Schleswig-Holstein</li><li>• Hamburg</li><li>• Bremen</li><li>• Lower Saxony</li><li>• Westfalia-Lippe</li><li>• Northrine</li><li>• Hesse</li><li>• Rhineland-Palatinate</li><li>• Baden Wuerttemberg</li><li>• Bavaria</li><li>• Saarland</li></ul> |
