# Supplementary material for: Pneumococcal vaccination rates in immunocompromised patients in Germany: A retrospective cohort study to assess sequential vaccination rates and changes over time
Source: PubMed Central journal article supplement (PMC8939779; doi:10.1371/journal.pone.0265433), 2022-03-22
Supplement: pone.0265433.s004.pdf [file pone.0265433.s004.pdf]

**Table S3 Vaccination rates (with 95% CI) by physician specialty that first diagnosed immunocompromised condition; differences between former east and western German federal states**

| First diagnosis of condition resulting in immunocompromised status: | Cohort | Germany (former) West (without Berlin) |              |                            | Germany (former) East (with Berlin) |              |                            |
|---------------------------------------------------------------------|--------|----------------------------------------|--------------|----------------------------|-------------------------------------|--------------|----------------------------|
|                                                                     |        | N cohort (%)                           | N vaccinated | Vaccination rates (95% CI) | N cohort (%)                        | N vaccinated | Vaccination rates (95% CI) |
| GP                                                                  | A      | 63,560 (43.9%)                         | 2,434        | 3.8% (3.7%-4.0%)           | 19,011 (39.4%)                      | 1,286        | 6.8% (6.4%-7.1%)           |
|                                                                     | B      | 96,383 (43.7%)                         | 5,069        | 5.3% (5.1%-5.4%)           | 27,648 (40.6%)                      | 2,815        | 10.2% (9.8%-10.5%)         |
| Rheumatologist                                                      | A      | 1,668 (1.2%)                           | 163          | 9.8% (8.4%-11.2%)          | 689 (1.4%)                          | 94           | 13.6% (11.2%-16.3%)        |
|                                                                     | B      | 2,633 (1.2%)                           | 299          | 11.4% (10.2%-12.6%)        | 1,035 (1.5%)                        | 162          | 15.7% (13.5%-17.9%)        |
| Oncologist                                                          | A      | 1,339 (0.9%)                           | 41           | 3.1% (2.2%-4.0%)           | 569 (1.2%)                          | 45           | 7.9% (5.8%-10.2%)          |
|                                                                     | B      | 2,282 (1.0%)                           | 130          | 5.7% (4.8%-6.7%)           | 687 (1.0%)                          | 61           | 8.9% (6.9%-11.1%)          |
| Pneumologist                                                        | A      | 691 (0.5%)                             | 67           | 9.7% (7.6%-12.0%)          | 233 (0.5%)                          | 26           | 11.2% (7.4%-15.4%)         |
|                                                                     | B      | 1,037 (0.5%)                           | 106          | 10.2% (8.4%-12.1%)         | 287 (0.4%)                          | 60           | 20.9% (16.3%-25.7%)        |
| Pediatrician                                                        | A      | 4,887 (3.4%)                           | 36           | 0.7% (0.5%-1.0%)           | 1,531 (3.2%)                        | 25           | 1.6% (1.1%-2.3%)           |
|                                                                     | B      | 5,908 (2.7%)                           | 51           | 0.9% (0.6%-1.1%)           | 1,818 (2.7%)                        | 20           | 1.1% (0.7%-1.6%)           |
| Internist                                                           | A      | 2,312 (1.6%)                           | 138          | 6.0% (5.0%-7.0%)           | 1,156 (2.4%)                        | 78           | 6.7% (5.4%-8.3%)           |
|                                                                     | B      | 3,486 (1.6%)                           | 246          | 7.1% (6.2%-7.9%)           | 1,340 (2.0%)                        | 135          | 10.1% (8.5%-11.7%)         |
| Other                                                               | A      | 34,984 (24.2%)                         | 1,118        | 3.2% (3.0%-3.4%)           | 13,316 (27.6%)                      | 704          | 5.3% (4.9%-5.7%)           |
|                                                                     | B      | 51,123 (23.2%)                         | 2,204        | 4.3% (4.1%-4.5%)           | 16,870 (24.8%)                      | 1,363        | 8.1% (7.7%-8.5%)           |
| In hospital                                                         | A      | 31,920 (22.1%)                         | 1,462        | 4.6% (4.4%-4.8%)           | 12,071 (25.0%)                      | 754          | 6.2% (5.8%-6.7%)           |
|                                                                     | B      | 53,621 (24.3%)                         | 3,030        | 5.7% (5.5%-5.8%)           | 18,589 (27.3%)                      | 1,686        | 9.1% (8.7%-9.5%)           |
| Unknown                                                             | A      | 11,843 (8.2%)                          | 487          | 4.1% (3.8%-4.5%)           | 2,741 (5.7%)                        | 288          | 10.5% (9.4%-11.7%)         |
|                                                                     | B      | 17,309 (7.8%)                          | 951          | 5.5% (5.2%-5.8%)           | 4,356 (6.4%)                        | 498          | 11.4% (10.5%-12.4%)        |
