# Supplementary material for: Pneumococcal vaccination rates in immunocompromised patients in Germany: A retrospective cohort study to assess sequential vaccination rates and changes over time
Source: PubMed Central journal article supplement (PMC8939779; doi:10.1371/journal.pone.0265433), 2022-03-22
Supplement: pone.0265433.s005.pdf [file pone.0265433.s005.pdf]

**Table S4: Percentage (%) of patients with a sequential vaccination in days following a first vaccination to a sequential vaccination in a 15-month period in cohort B patients aged 16-59 ys (upper and lower 95% CI) and ≥60 ys (upper and lower 95% CI) (data for Fig 3)**

| time to second vaccination (days) | Age group 16-59 ys |              |              | Age group ≥60 ys |              |              |
|-----------------------------------|--------------------|--------------|--------------|------------------|--------------|--------------|
|                                   | %                  | lower 95% CI | upper 95% CI | %                | lower 95% CI | upper 95% CI |
| 1                                 | 0.00%              | 0.00%        | 0.00%        | 0.00%            | 0.00%        | 0.00%        |
| 15                                | 0.08%              | 0.02%        | 0.23%        | 0.05%            | 0.02%        | 0.10%        |
| 29                                | 0.20%              | 0.10%        | 0.40%        | 0.10%            | 0.06%        | 0.17%        |
| 43                                | 0.53%              | 0.35%        | 0.81%        | 0.14%            | 0.09%        | 0.22%        |
| 57                                | 0.73%              | 0.51%        | 1.05%        | 0.21%            | 0.15%        | 0.31%        |
| 71                                | 0.94%              | 0.68%        | 1.29%        | 0.26%            | 0.18%        | 0.36%        |
| 85                                | 1.01%              | 0.74%        | 1.38%        | 0.32%            | 0.24%        | 0.43%        |
| 99                                | 1.19%              | 0.90%        | 1.58%        | 0.44%            | 0.34%        | 0.57%        |
| 113                               | 1.29%              | 0.98%        | 1.70%        | 0.51%            | 0.40%        | 0.65%        |
| 127                               | 1.29%              | 0.98%        | 1.70%        | 0.55%            | 0.43%        | 0.69%        |
| 141                               | 1.42%              | 1.10%        | 1.84%        | 0.58%            | 0.46%        | 0.72%        |
| 155                               | 1.55%              | 1.21%        | 1.99%        | 0.66%            | 0.54%        | 0.82%        |
| 169                               | 1.71%              | 1.35%        | 2.16%        | 0.80%            | 0.66%        | 0.97%        |
| 183                               | 2.18%              | 1.76%        | 2.69%        | 0.98%            | 0.82%        | 1.16%        |
| 197                               | 2.62%              | 2.16%        | 3.17%        | 1.07%            | 0.91%        | 1.26%        |
| 211                               | 2.99%              | 2.50%        | 3.57%        | 1.17%            | 1.00%        | 1.37%        |
| 225                               | 3.17%              | 2.66%        | 3.77%        | 1.23%            | 1.05%        | 1.43%        |
| 239                               | 3.49%              | 2.95%        | 4.11%        | 1.27%            | 1.10%        | 1.48%        |
| 253                               | 3.67%              | 3.12%        | 4.31%        | 1.37%            | 1.18%        | 1.58%        |
| 267                               | 3.78%              | 3.22%        | 4.43%        | 1.42%            | 1.23%        | 1.64%        |
| 281                               | 3.96%              | 3.39%        | 4.63%        | 1.55%            | 1.35%        | 1.78%        |
| 295                               | 4.26%              | 3.66%        | 4.94%        | 1.59%            | 1.39%        | 1.82%        |
| 309                               | 4.52%              | 3.91%        | 5.23%        | 1.63%            | 1.43%        | 1.86%        |
| 323                               | 4.77%              | 4.14%        | 5.49%        | 1.69%            | 1.49%        | 1.93%        |
| 337                               | 4.95%              | 4.31%        | 5.69%        | 1.82%            | 1.61%        | 2.07%        |
| 351                               | 5.28%              | 4.62%        | 6.04%        | 1.99%            | 1.77%        | 2.25%        |
| 365                               | 5.61%              | 4.92%        | 6.39%        | 2.22%            | 1.98%        | 2.49%        |
| 379                               | 5.91%              | 5.21%        | 6.71%        | 2.39%            | 2.14%        | 2.67%        |
| 393                               | 6.05%              | 5.34%        | 6.86%        | 2.55%            | 2.29%        | 2.84%        |
| 407                               | 6.30%              | 5.57%        | 7.12%        | 2.72%            | 2.45%        | 3.01%        |
| 421                               | 6.50%              | 5.76%        | 7.34%        | 2.80%            | 2.53%        | 3.10%        |
| 435                               | 6.71%              | 5.95%        | 7.55%        | 2.91%            | 2.63%        | 3.22%        |
| 449                               | 6.77%              | 6.01%        | 7.62%        | 3.02%            | 2.73%        | 3.33%        |
